# Supplementary material for: Detection and identification of SARS-CoV-2 and influenza a based on microfluidic technology
Source: Royal Society of Chemistry journal article supplement (doi:10.1039/d4ay00847b), 2024-01-01

## *Supplementary Material*

### **Detection and identification of SARS-COV-2 and Influenza A based on microfluidic technology**

#### **1 Supplementary Data**

**Table S1 qPCR results data for 18 clinical samples.**

| <b>Sample</b> | <b>Sam<br/>ple<br/>num<br/>ber</b> | <b>qPCR-<br/>Ct value</b> | <b>qPCR<br/>experime<br/>ntal result</b> |
|---------------|------------------------------------|---------------------------|------------------------------------------|
| SARS-CoV-2    | S1                                 | 24.87                     | Positive                                 |
|               | S2                                 | 33.34                     | Positive                                 |
|               | S3                                 | 25.46                     | Positive                                 |
|               | S4                                 | 16.5                      | Positive                                 |
|               | S5                                 | 25.37                     | Positive                                 |
|               | S6                                 | --                        | Negative                                 |
| H1N1          | S7                                 | 33.52                     | Positive                                 |
|               | S8                                 | 20.45                     | Positive                                 |
|               | S9                                 | 25.37                     | Positive                                 |
|               | S10                                | --                        | Negative                                 |
|               | S11                                | --                        | Negative                                 |
|               | S12                                | 19.93                     | Positive                                 |
| H3N2          | S13                                | 24.93                     | Positive                                 |
|               | S14                                | 25.58                     | Positive                                 |
|               | S15                                | 25.27                     | Positive                                 |
|               | S16                                | 24.81                     | Positive                                 |
|               | S17                                | --                        | Negative                                 |
|               | S18                                | --                        | Negative                                 |

**Fig. S1 Sensitivity curve graphs for the detection of SARS-CoV-2, H1N1, and H3N2 using the qPCR method.**

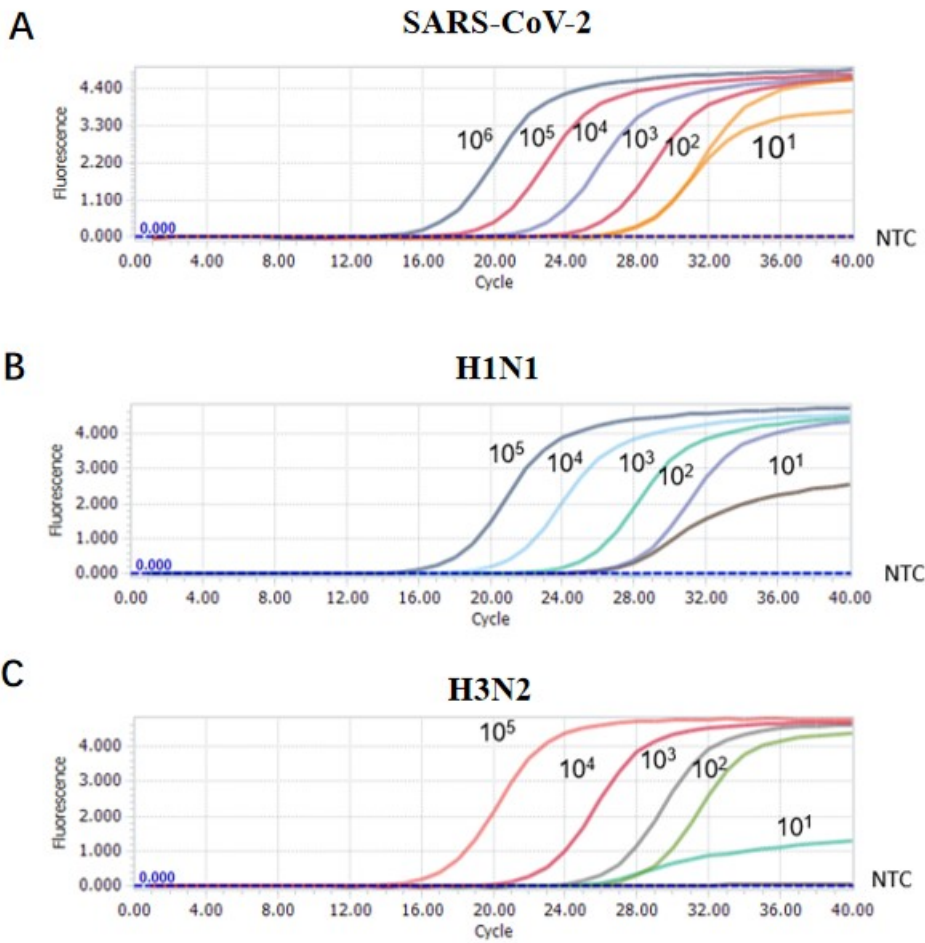

**Fig. S2 Sensitivity curve graphs for the detection of SARS-CoV-2, H1N1, and H3N2 using the**

**PCR method.** Lane M, 2000 Marker; lane 1,  $1 \times 10^8$  copies/ul; lane 2,  $1 \times 10^7$  copies/ul; lane 3,  $1 \times 10^6$  copies/ul; lane 4,  $1 \times 10^5$  copies/ul; lane 5,  $1 \times 10^4$  copies/ul; lane 6,  $1 \times 10^3$  copies/ul; lane N, non-template control (NTC, water).

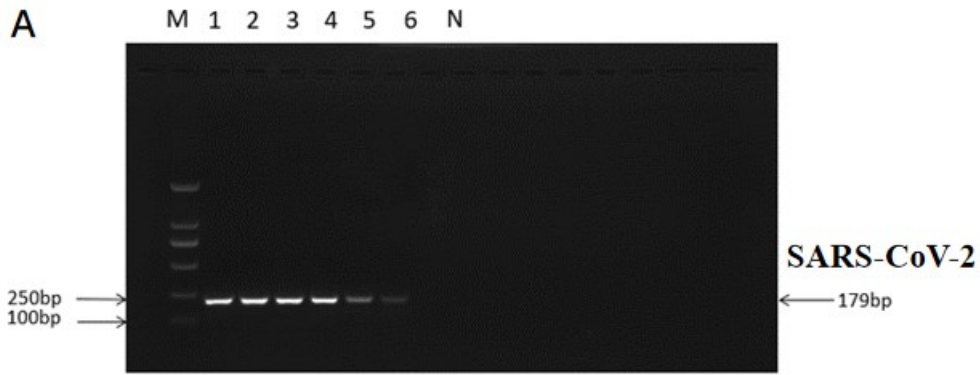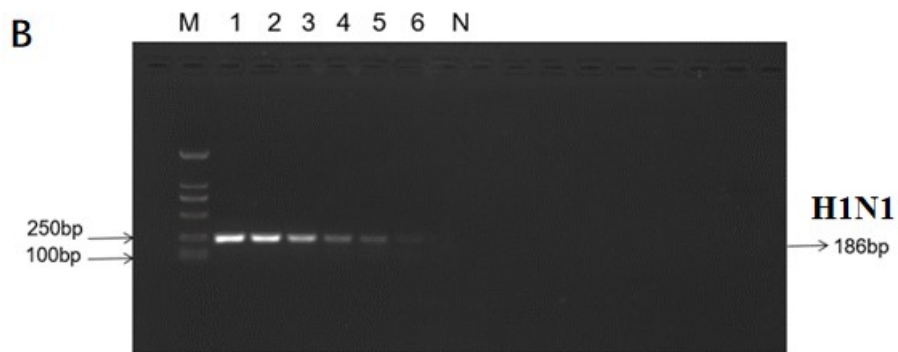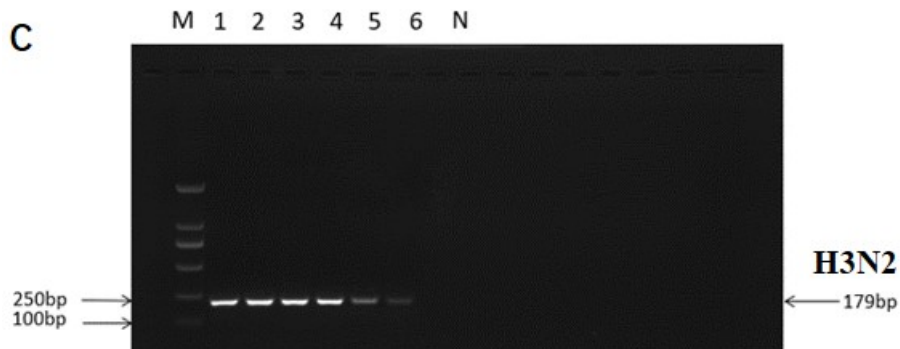

Supplement: d4ay00847b1.pdf [file d4ay00847b1.pdf]
